# Supplementary material for: Random Forest Classification of Multitemporal Landsat 8 Spectral Data and Phenology Metrics for Land Cover Mapping in the Sonoran and Mojave Deserts
Source: MDPI journal article supplement (doi:10.3390/rs15051266), 2023-02-25
Supplement: s1 [file s1]

**Table S1.** Table of relationships made between the final land cover classification system and INEGI data. Rows of the table correspond to land cover classes which share similar vegetation characteristics at a high level. This table was designed to facilitate the initial validation of the final results in comparison with open-source reference maps from INEGI.

| Land Cover Class                                                                                                                                                                                                                                                                                                                                                                | INEGI Class                                                                                                          |
|---------------------------------------------------------------------------------------------------------------------------------------------------------------------------------------------------------------------------------------------------------------------------------------------------------------------------------------------------------------------------------|----------------------------------------------------------------------------------------------------------------------|
| Open Water (Fresh)                                                                                                                                                                                                                                                                                                                                                              | Water Body                                                                                                           |
| Mojave Mid-Elevation Mixed Desert Scrub,<br>Sonoran Mid-Elevation Desert Scrub,<br>Chihuahuan Succulent Desert Scrub,<br>Sonoran Paloverde-Mixed Cacti Desert Scrub                                                                                                                                                                                                             | Rosetophyllous Desert,<br>Sarcocaulous Shrubland,<br>Crassicaulescent Shrubland,<br>Sarco-crassicaulescent Shrubland |
| Madrean Encinal,<br>Mogollon Chaparral,<br>Madrean Pinyon-Juniper Woodland,<br>Colorado Plateau Pinyon-Juniper Woodland,<br>Madrean Juniper Savanna,<br>Madrean Pine-Oak Forest and Woodland                                                                                                                                                                                    | Chaparral,<br>Oak-Pine Forest,<br>Pine Forest,<br>Oak Forest                                                         |
| North American Warm Desert Riparian Woodland and Shrubland,<br>North American Warm Desert Lower Montane Riparian Woodland and Shrubland,<br>Introduced Riparian and Wetland Vegetation,                                                                                                                                                                                         | Gallery Forest,<br>Gallery Vegetation,<br>Subtropical Shrubland                                                      |
| North American Arid West Emergent Marsh,                                                                                                                                                                                                                                                                                                                                        | Tule Vegetation,<br>Mangrove Swamp                                                                                   |
| Undifferentiated Barren Land,<br>North American Warm Desert Pavement,<br>North American Warm Desert Active and Stabilized Dune,<br>Chihuahuan Stabilized Coppice Dune and Sand Flat Scrub,<br>Inter-Mountain Basins Shale Badland,<br>North American Warm Desert Bedrock Cliff and Outcrop,<br>North American Warm Desert Volcanic Rockland,<br>North American Warm Desert Wash | No Apparent Vegetation,<br>Sandy Desert Vegetation,<br>Coastal Dune Vegetation,                                      |
| Chihuahuan Creosotebush, Mixed Desert and Thorn Scrub;<br>Sonora-Mojave Creosotebush-White Bursage Desert Scrub                                                                                                                                                                                                                                                                 | Microphylls Desert,<br>Induced Pasture                                                                               |
| North American Warm Desert Playa,<br>Inter-Mountain Basins Playa                                                                                                                                                                                                                                                                                                                | Hydrophilic Halophile Vegetation,<br>Coastal Dune Vegetation                                                         |
| Apacherian-Chihuahuan Mesquite Upland Scrub,<br>North American Warm Desert Riparian Mesquite Bosque                                                                                                                                                                                                                                                                             | Xerophytic Mesquite,<br>Mesquite Forest                                                                              |
| Apacherian-Chihuahuan Semi-Desert Grassland and Steppe                                                                                                                                                                                                                                                                                                                          | Natural Grassland                                                                                                    |
| Sonora-Mojave Mixed Salt Desert Scrub                                                                                                                                                                                                                                                                                                                                           | Xerophytic Halophile Vegetation                                                                                      |
